# Supplementary material
Source: PubMed Central journal article supplement (PMC3713442)
Supplement: Supp_Fig1.pdf [file Supp_Fig1.pdf]

## Supplementary Data

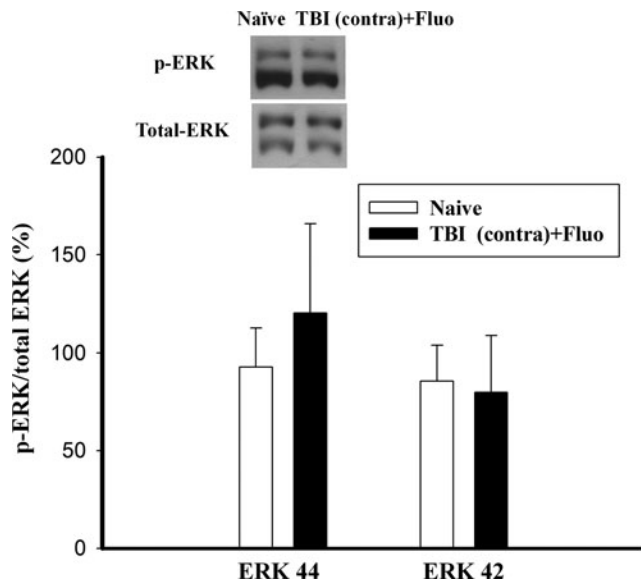

**SUPPLEMENTARY FIG. 1.** Fluoxetine (Fluo) has no effect on the phosphorylated state of extracellular signal regulated kinases (ERK1/2) in the contralateral site of traumatic brain injury (TBI) rats. On day 1, rats underwent fluid percussion injury, and fluoxetine (2.5 mg/kg) was administered intraperitoneally to the rats from day 4 to day 17. On day 18, hippocampus homogenates of the contralateral site were immunoblotted with antibodies that specifically recognizes dually phosphorylated ERK1/2.
